# Supplementary material
Source: PubMed Central journal article supplement (PMC123107)
Supplement: supp_142002099_0020Table2.pdf [file supp_142002099_0020Table2.pdf]

Supporting information for Leng and McMacken (2002) *Proc. Natl. Acad. Sci. USA*,  
10.1073/pnas.142002099.

**Table 2. Effect of specific DNA-binding proteins on transcription-induced DNA supercoiling by *E. coli* RNA polymerase**

| Protein(s) added | DNA template | Binding sites | Mass, kDa | $K_d$ , nM         | DNA-bending angle | Stimulation of supercoiling |
|------------------|--------------|---------------|-----------|--------------------|-------------------|-----------------------------|
| $\lambda$ O      | pRLM409      | 4             | 270       | 3                  | 85°               | ++++                        |
| $\lambda$ O      | pRLM411      | 1             | 67        | 3                  | 85°               | ++++                        |
| $\lambda$ O      | pRLM412      | 2             | 135       | 3                  | 85°               | ++++                        |
| <i>EcoRI</i>     | pRLM375      | 1             | 62        | $2 \times 10^{-3}$ | 20°               | –                           |

Transcription-supercoiling reactions were performed and analyzed as described in footnote (\*) to Table 1, except that *E. coli* RNA polymerase replaced T7 RNA polymerase. See the footnotes to Table 1 for additional information.
